# Supplementary material for: Stereocontrolled synthesis of orthogonally protected 2-substituted 4-aminopiperidines
Source: Royal Society of Chemistry journal article supplement (doi:10.1039/b904948g), 2009-01-01
Supplement: b904948g.pdf [file b904948g.pdf]

# Stereocontrolled Synthesis of Orthogonally Protected 2-Substituted 4-Aminopiperidines

Ramón Badorrey,<sup>a</sup> Elsa Portaña,<sup>a</sup> María D. Díaz-de-Villegas<sup>\*a</sup> and José A. Gálvez<sup>\*a</sup>

<sup>a</sup> Departamento de Química Orgánica, Instituto de Ciencia de Materiales de Aragón, Instituto Universitario de Catálisis Homogénea, Universidad de Zaragoza-CSIC, E-50009 Zaragoza, Spain. Fax: +34 976 761202; Tel: +34 976 762274; E-mail: [loladiaz@unizar.es](mailto:loladiaz@unizar.es), [jagl@unizar.es](mailto:jagl@unizar.es).

## Table of contents

|                                                                           |    |
|---------------------------------------------------------------------------|----|
| <sup>1</sup> H NMR and <sup>13</sup> C NMR spectra for compound <b>3</b>  | 2  |
| <sup>1</sup> H NMR and <sup>13</sup> C NMR spectra for compound <b>4</b>  | 3  |
| <sup>1</sup> H NMR and <sup>13</sup> C NMR spectra for compound <b>5</b>  | 4  |
| <sup>1</sup> H NMR and <sup>13</sup> C NMR spectra for compound <b>6</b>  | 5  |
| <sup>1</sup> H NMR and <sup>13</sup> C NMR spectra for compound <b>7</b>  | 6  |
| <sup>1</sup> H NMR and <sup>13</sup> C NMR spectra for compound <b>8</b>  | 7  |
| <sup>1</sup> H NMR and <sup>13</sup> C NMR spectra for compound <b>10</b> | 8  |
| <sup>1</sup> H NMR and <sup>13</sup> C NMR spectra for compound <b>11</b> | 9  |
| <sup>1</sup> H NMR and <sup>13</sup> C NMR spectra for compound <b>12</b> | 10 |
| <sup>1</sup> H NMR and <sup>13</sup> C NMR spectra for compound <b>13</b> | 11 |
| <sup>1</sup> H NMR and <sup>13</sup> C NMR spectra for compound <b>14</b> | 12 |
| <sup>1</sup> H NMR and <sup>13</sup> C NMR spectra for compound <b>15</b> | 13 |
| <sup>1</sup> H- <sup>1</sup> H noesy NMR spectrum for compound <b>4</b>   | 14 |
| <sup>1</sup> H- <sup>1</sup> H noesy NMR spectrum for compound <b>5</b>   | 15 |
| ORTEP drawing of compound <b>3</b>                                        | 16 |

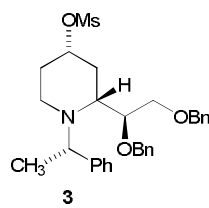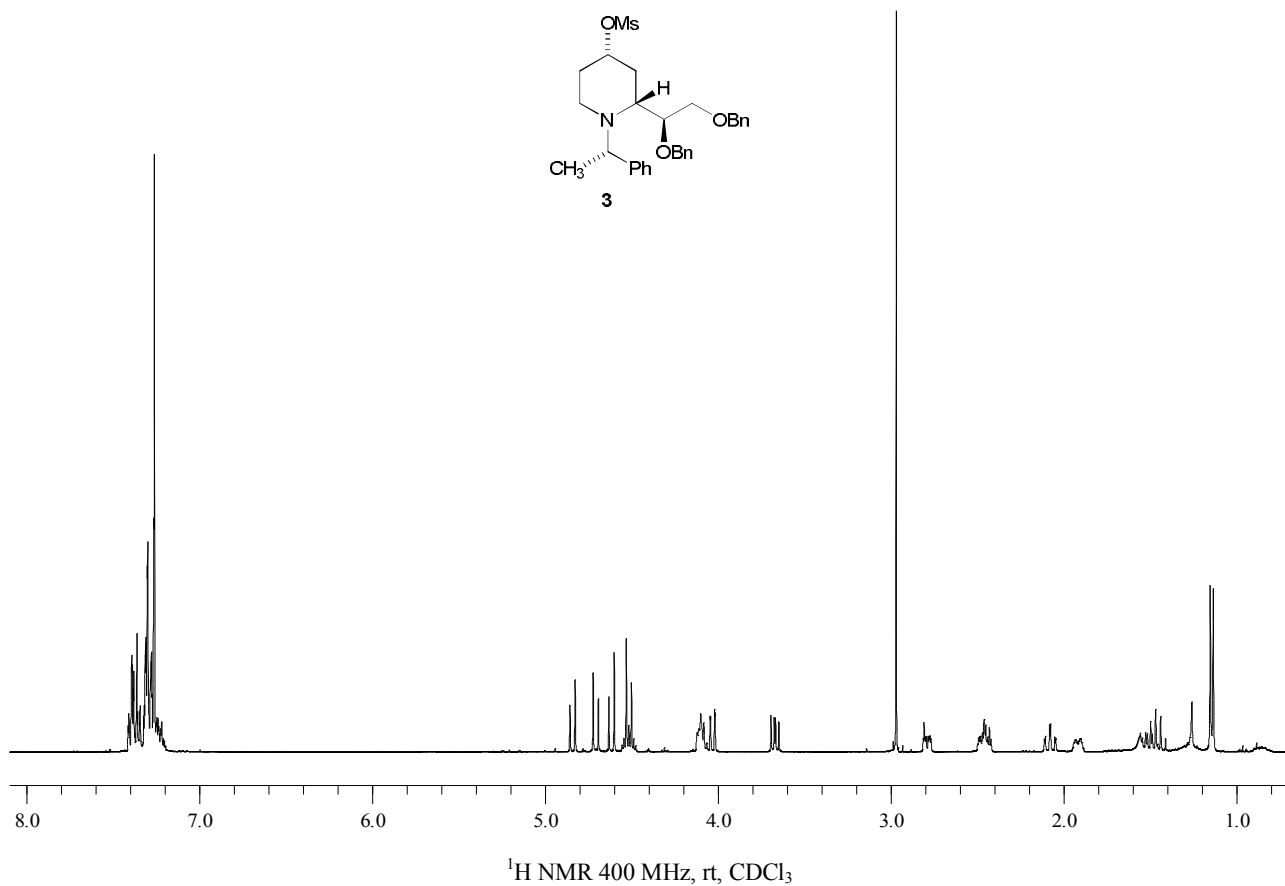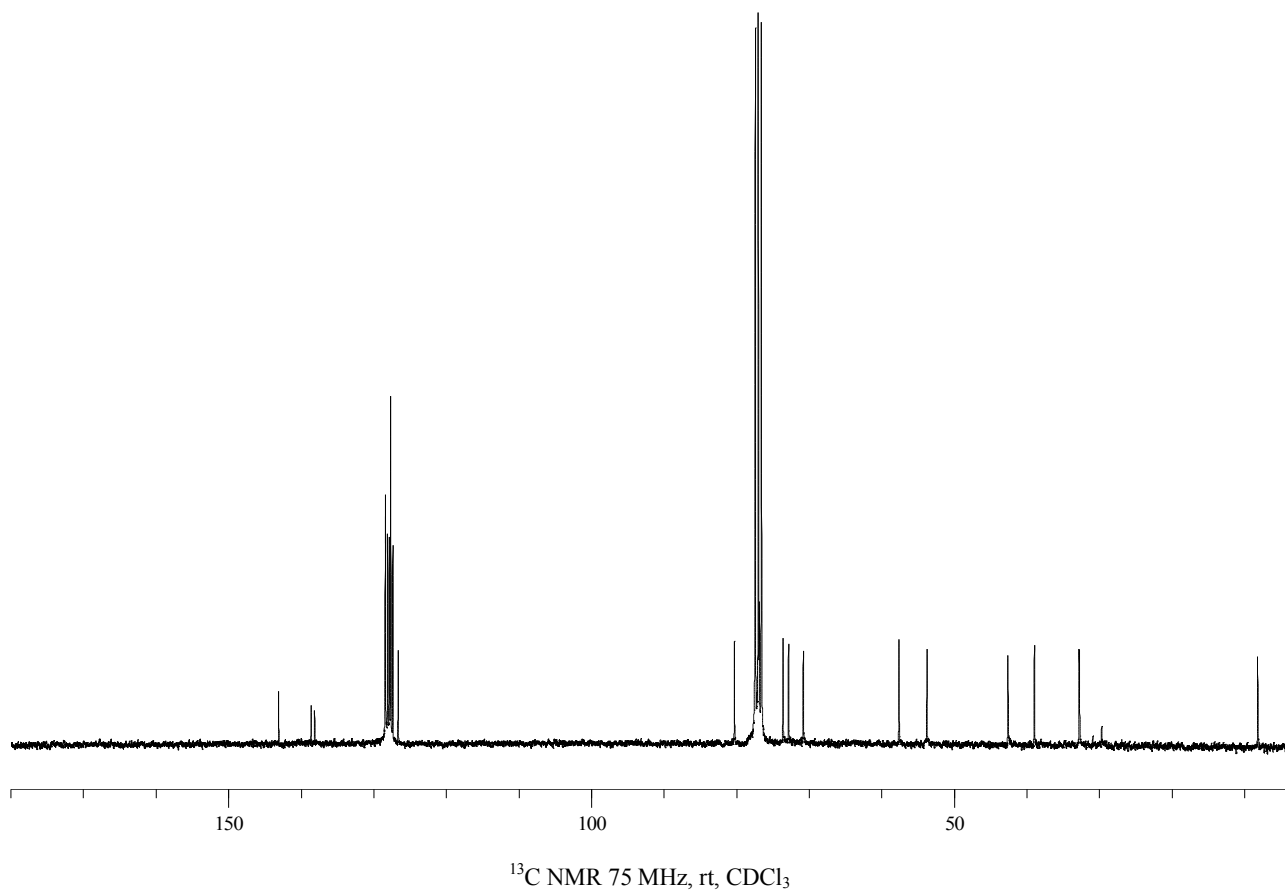

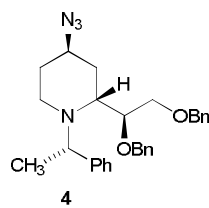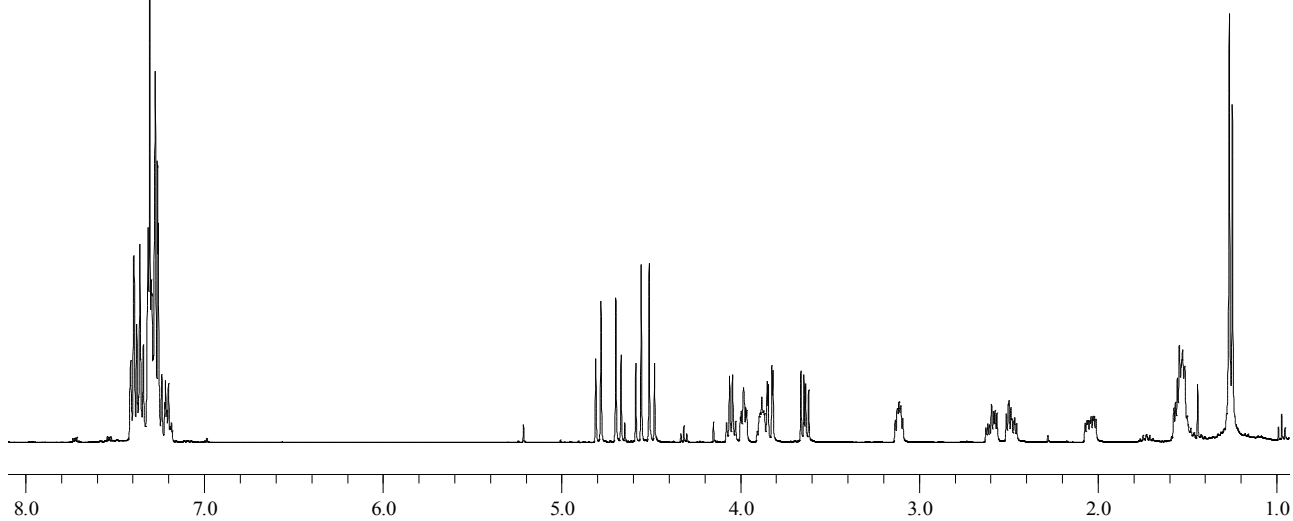

$^1H$  NMR 400 MHz,  $rt$ ,  $CDCl_3$

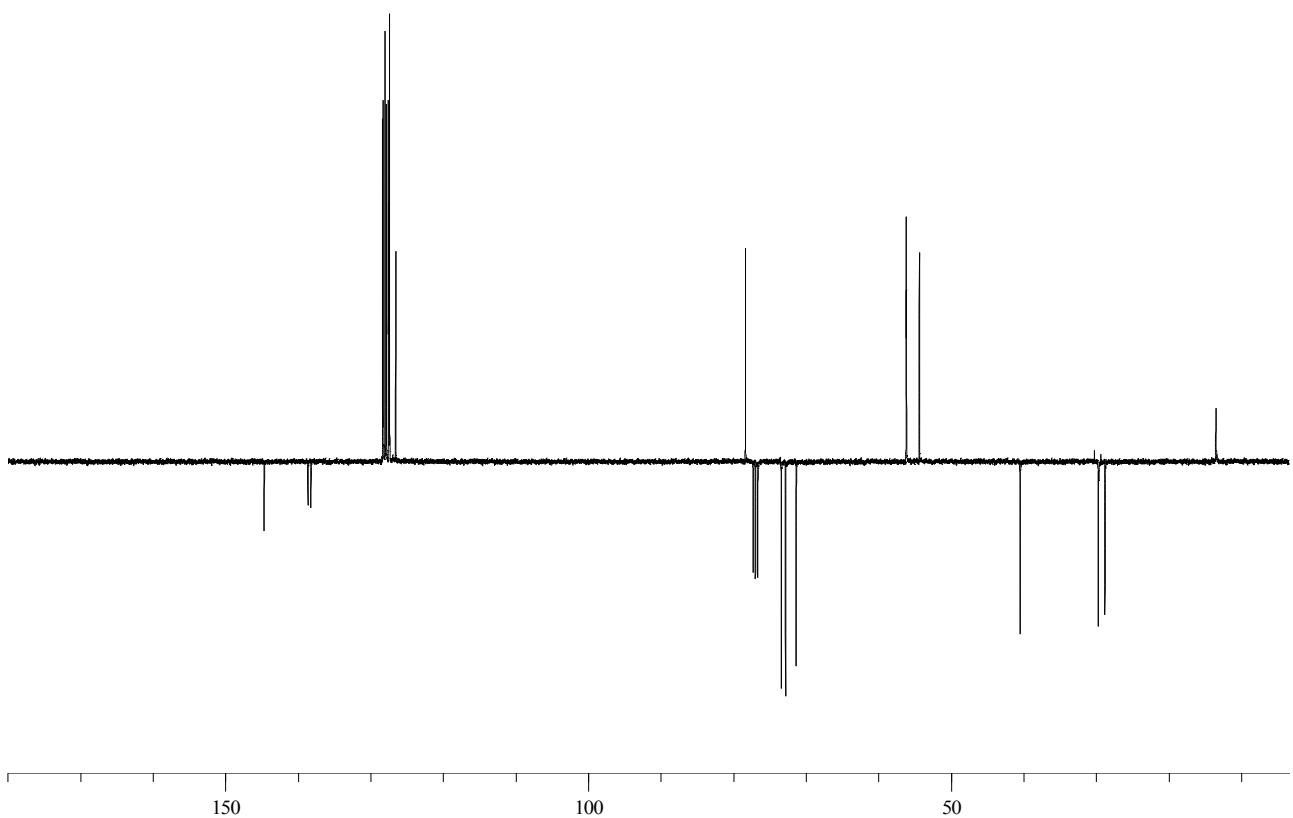

$^{13}C$  NMR 100 MHz,  $rt$ ,  $CDCl_3$

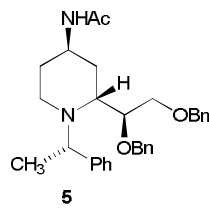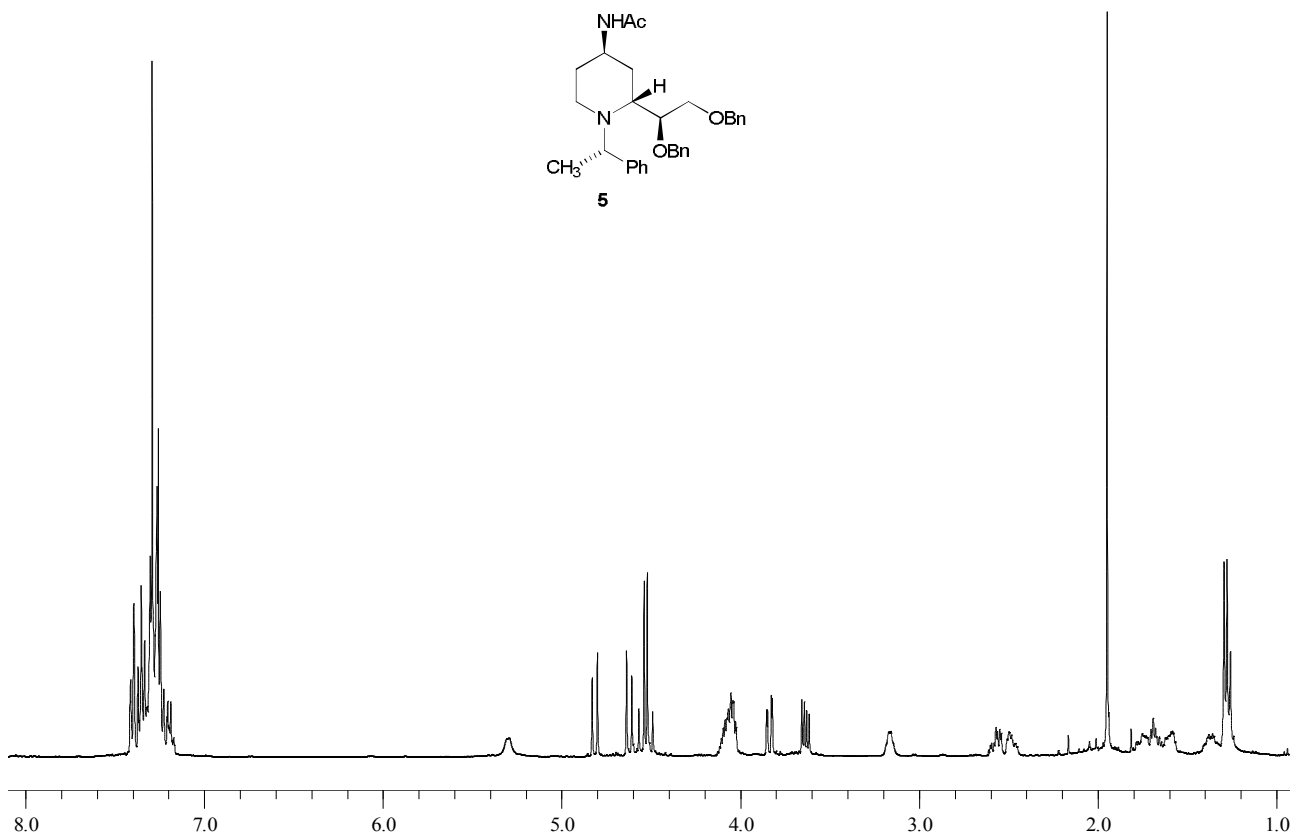

<sup>1</sup>H NMR 400 MHz, rt, CDCl<sub>3</sub>

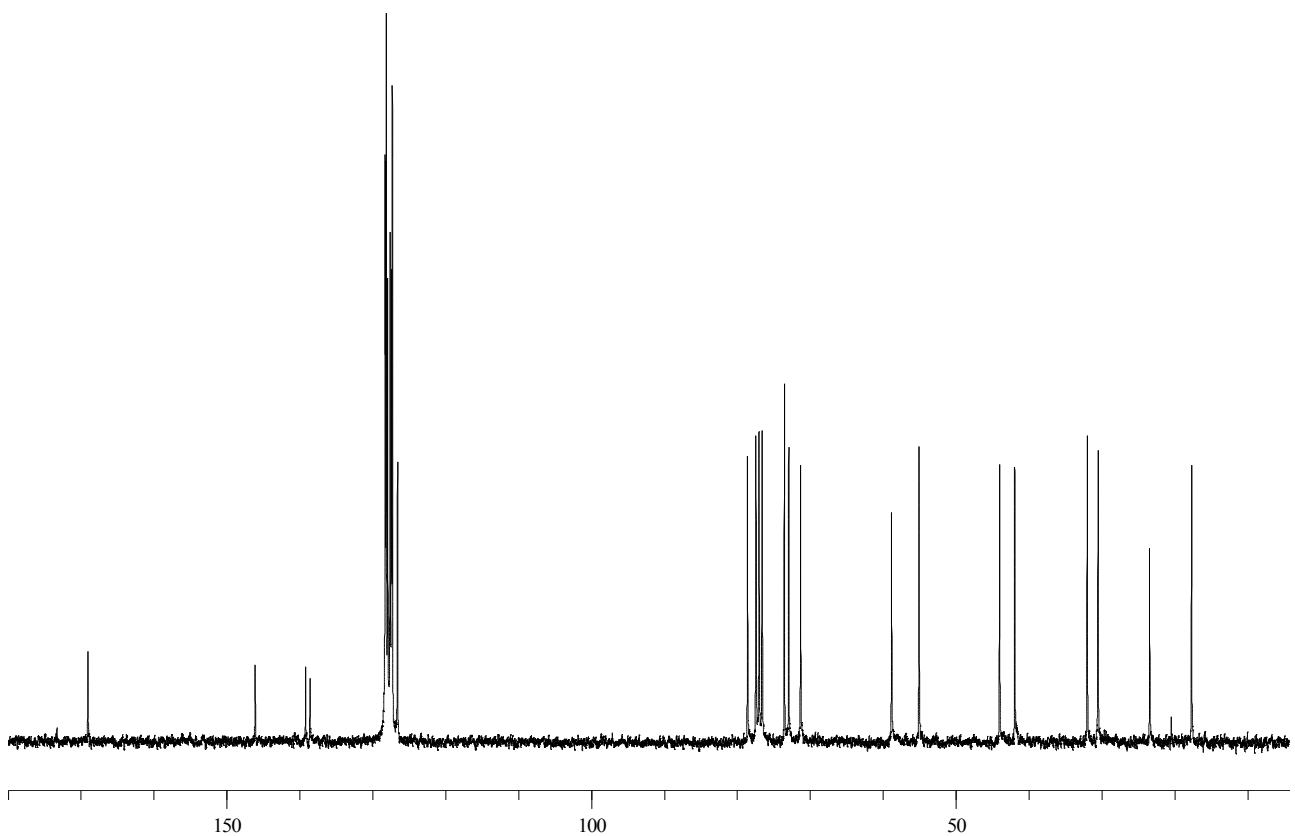

<sup>13</sup>C NMR 75 MHz, rt, CDCl<sub>3</sub>

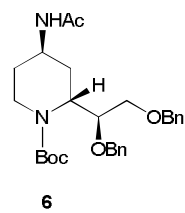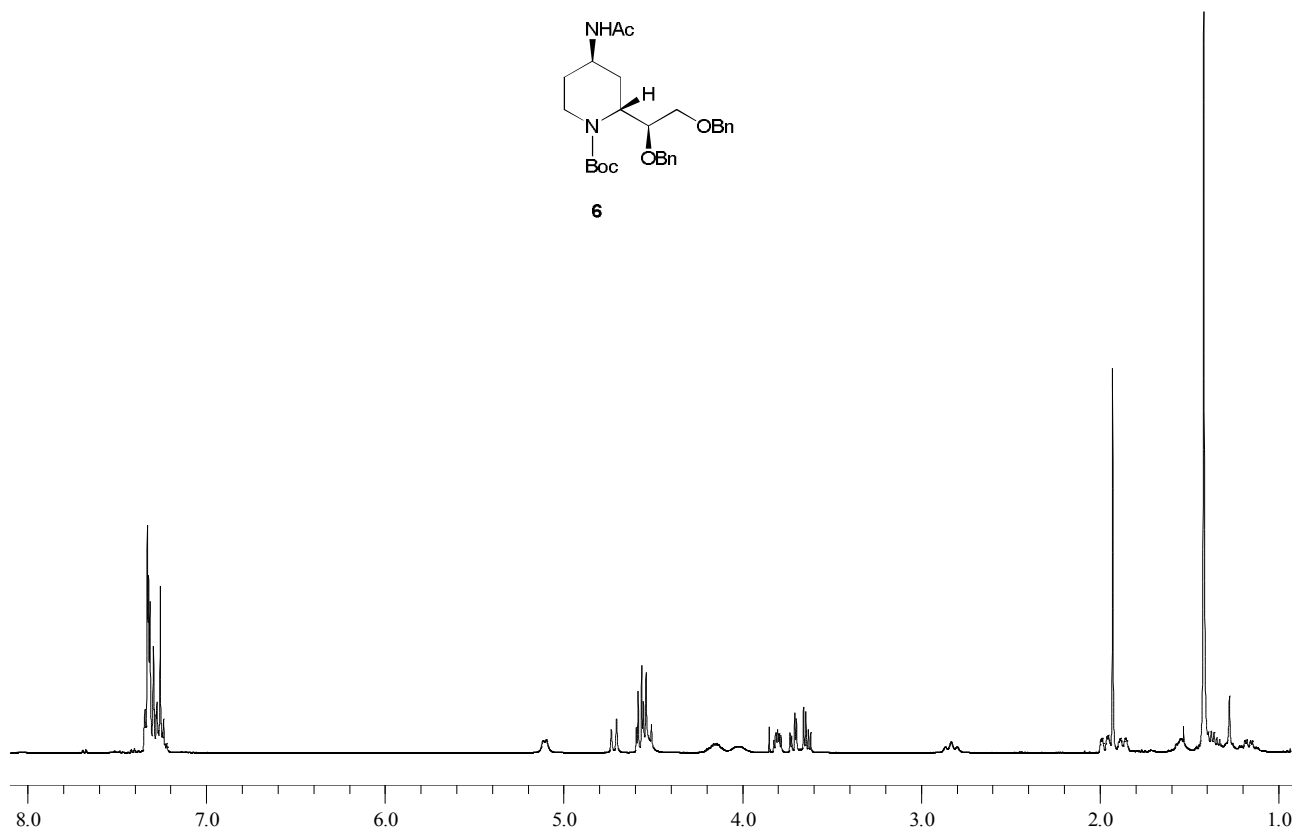

$^1\text{H}$  NMR 400 MHz, 333 K,  $\text{CDCl}_3$

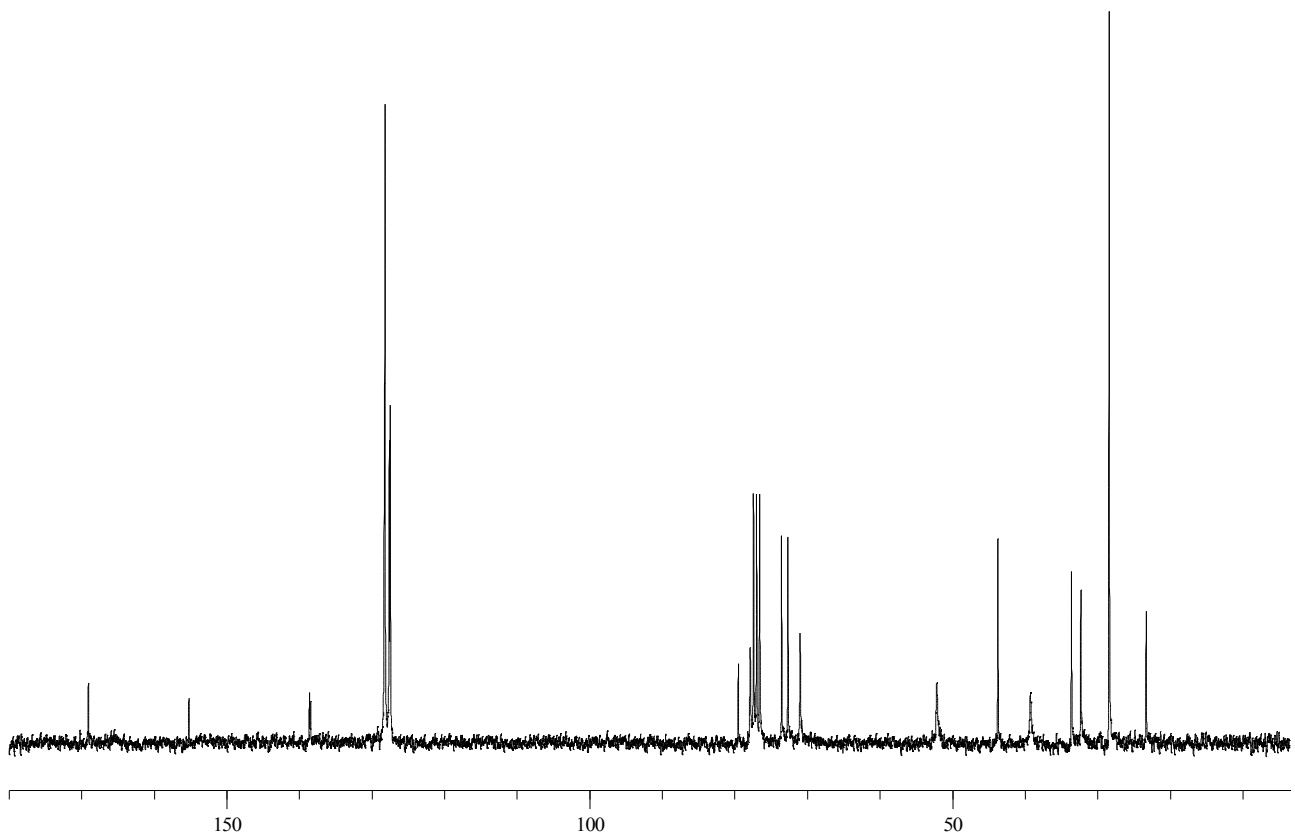

$^{13}\text{C}$  NMR 75 MHz, 333 K,  $\text{CDCl}_3$

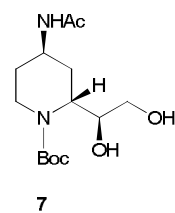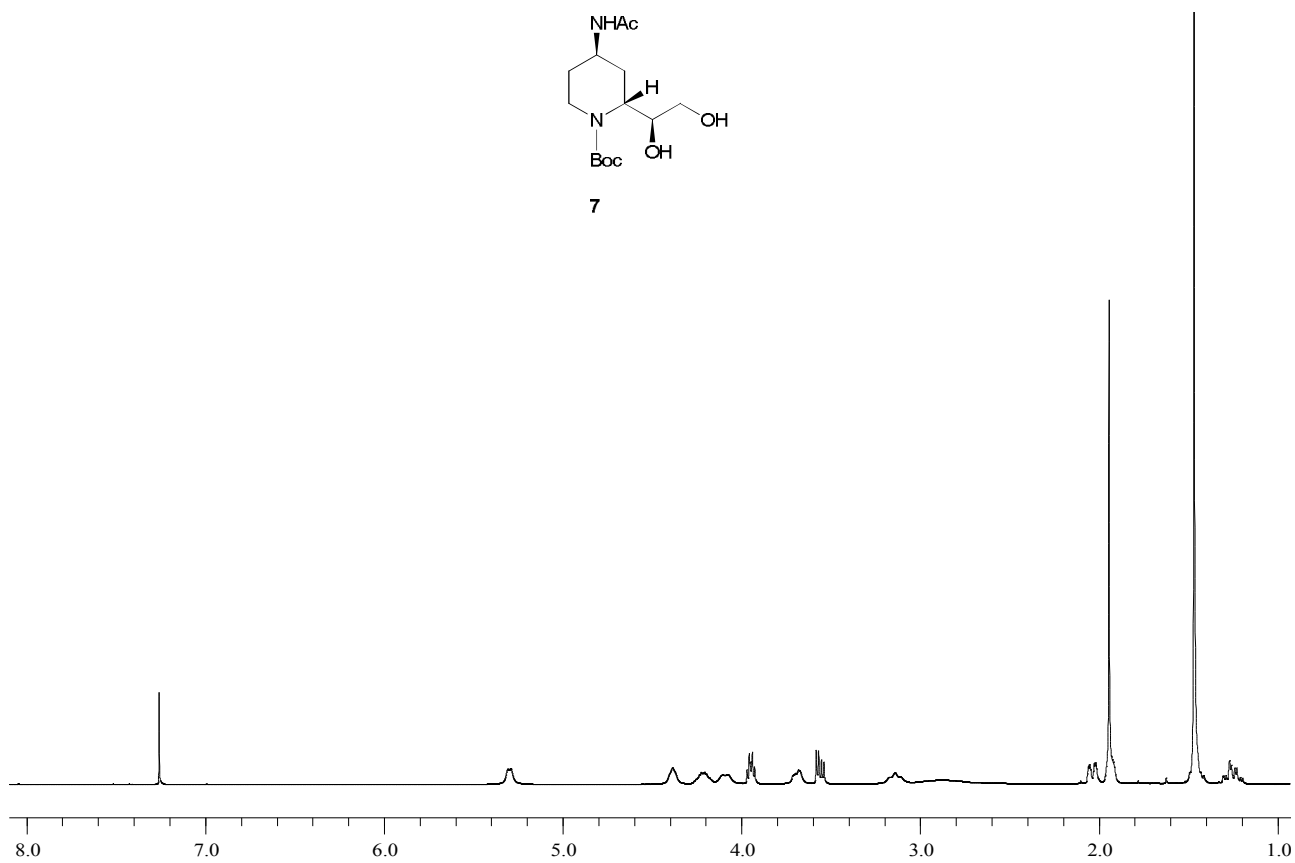

<sup>1</sup>H NMR 400 MHz, 333 K, CDCl<sub>3</sub>

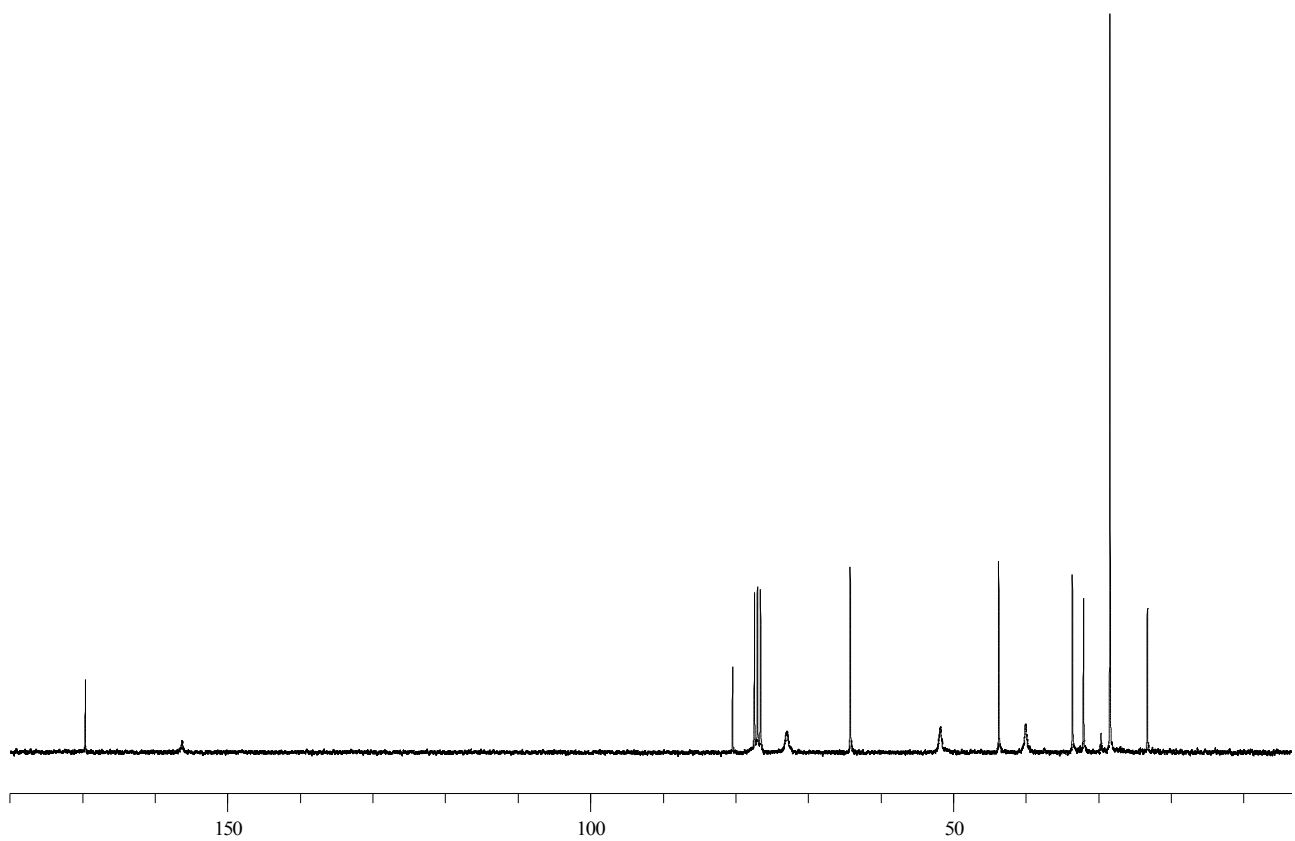

<sup>13</sup>C NMR 75 MHz, 333 K, CDCl<sub>3</sub>

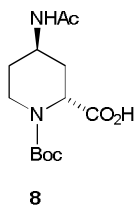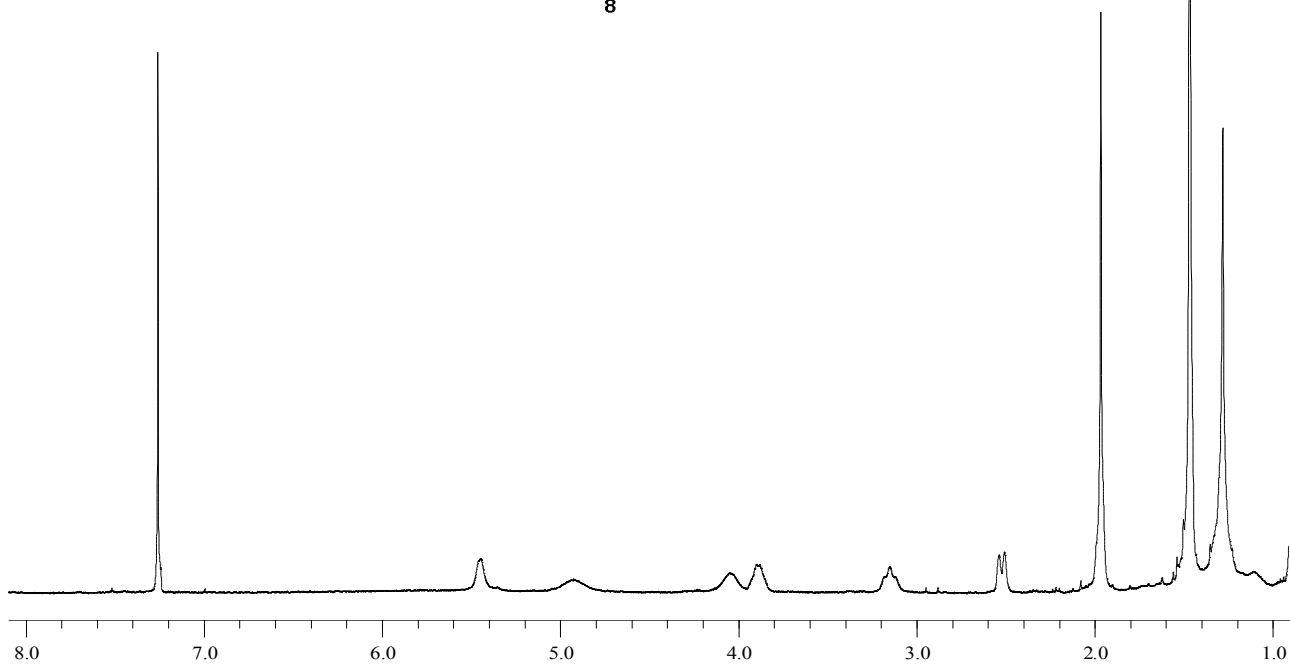

$^1\text{H}$  NMR 400 MHz, 333 K,  $\text{CDCl}_3$

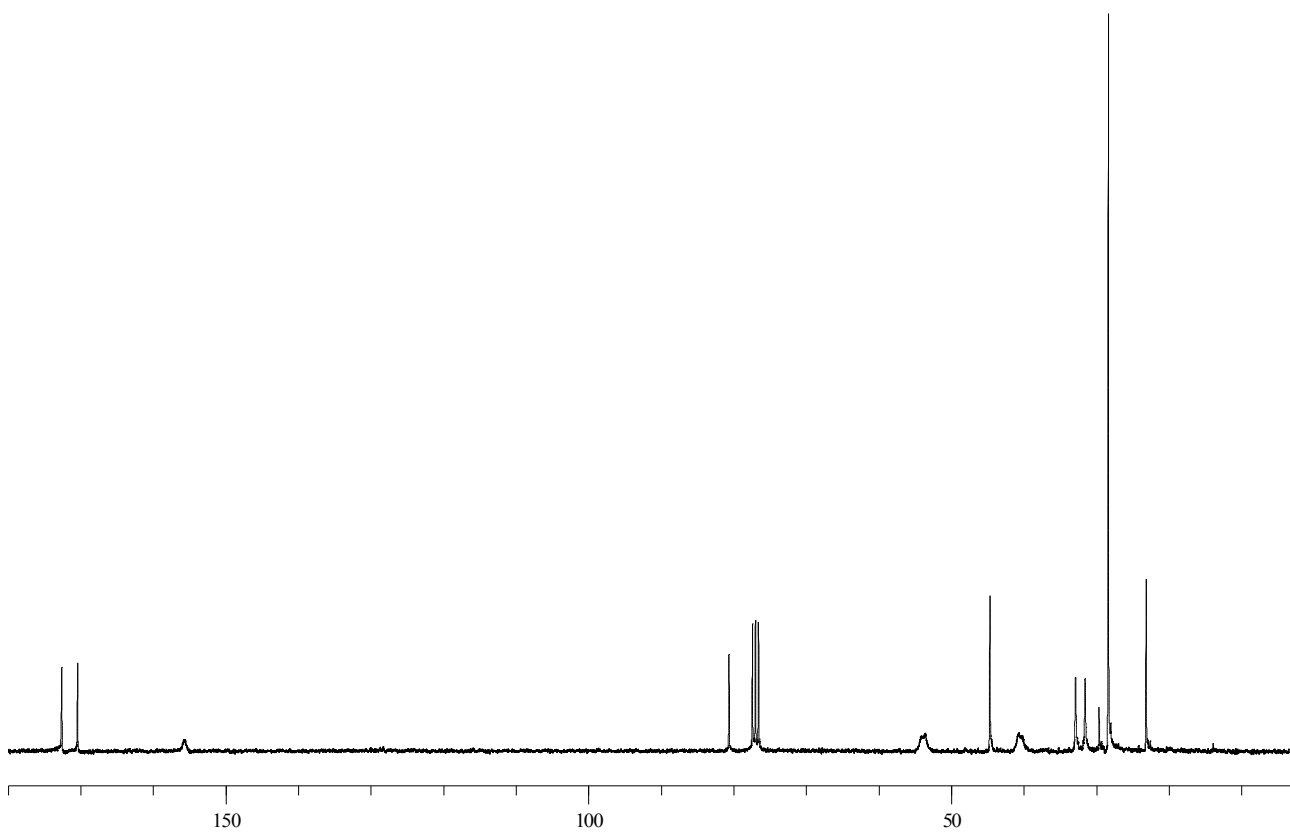

$^{13}\text{C}$  NMR 75 MHz, 333 K,  $\text{CDCl}_3$

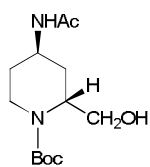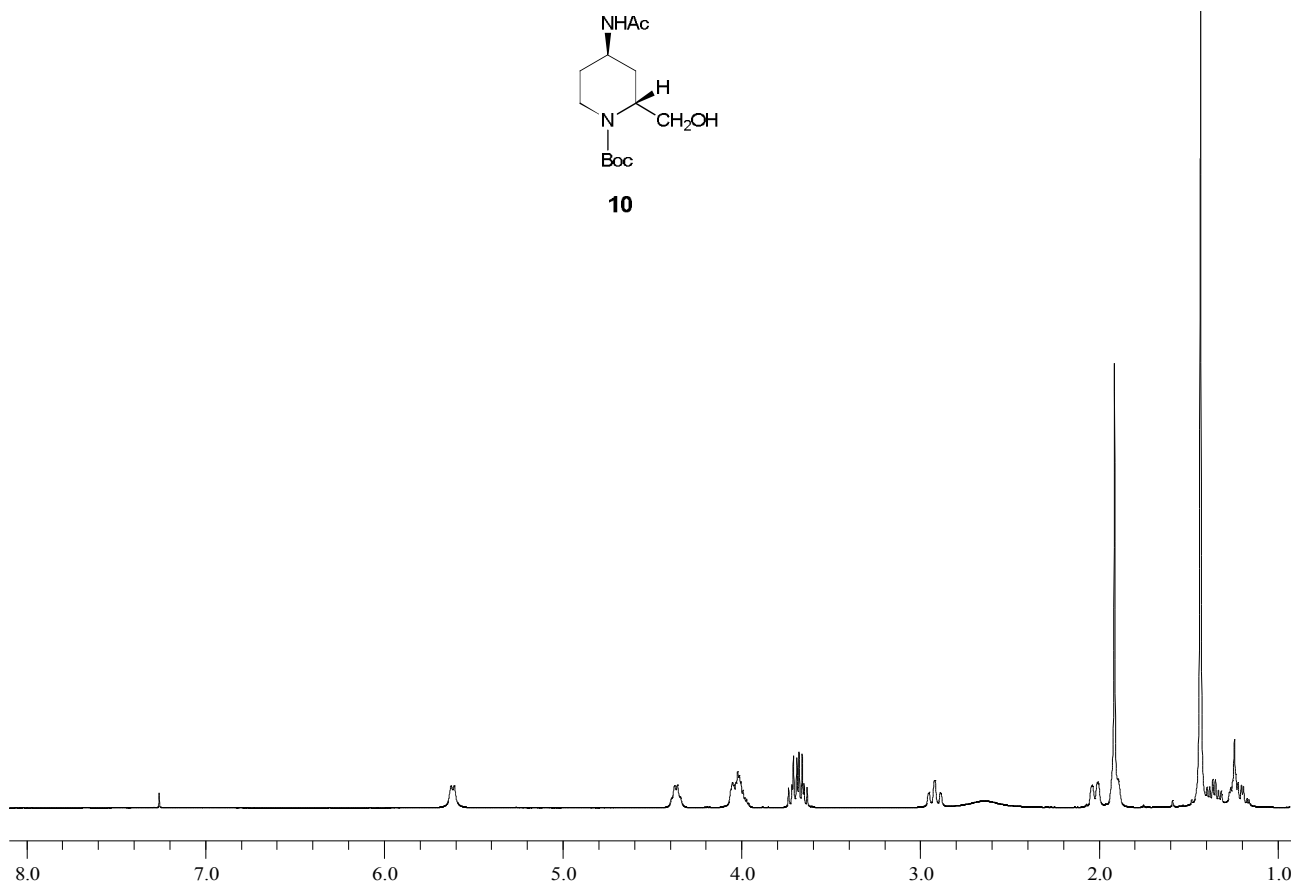

$^1\text{H}$  NMR 400 MHz, 333 K,  $\text{CDCl}_3$

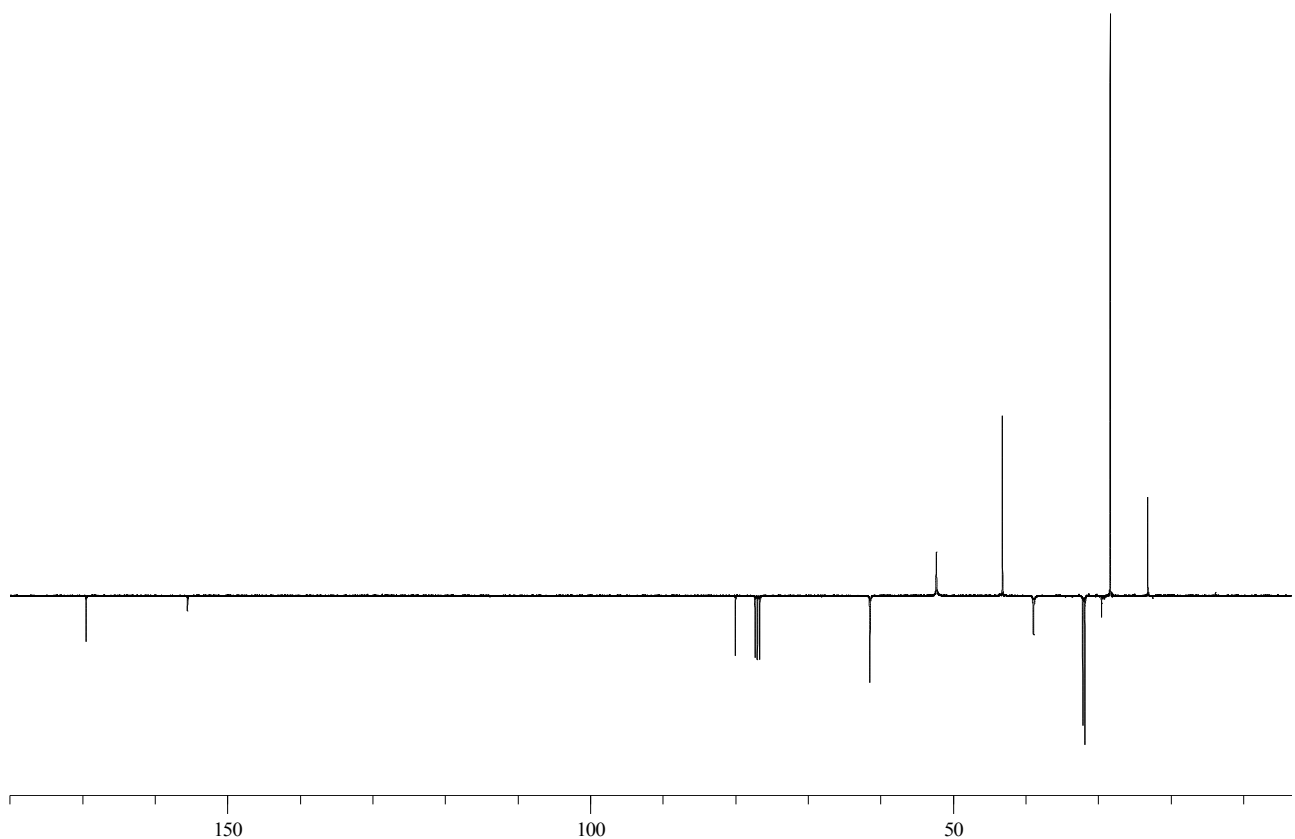

$^{13}\text{C}$  NMR 100 MHz, 333 K,  $\text{CDCl}_3$



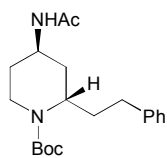

**11**

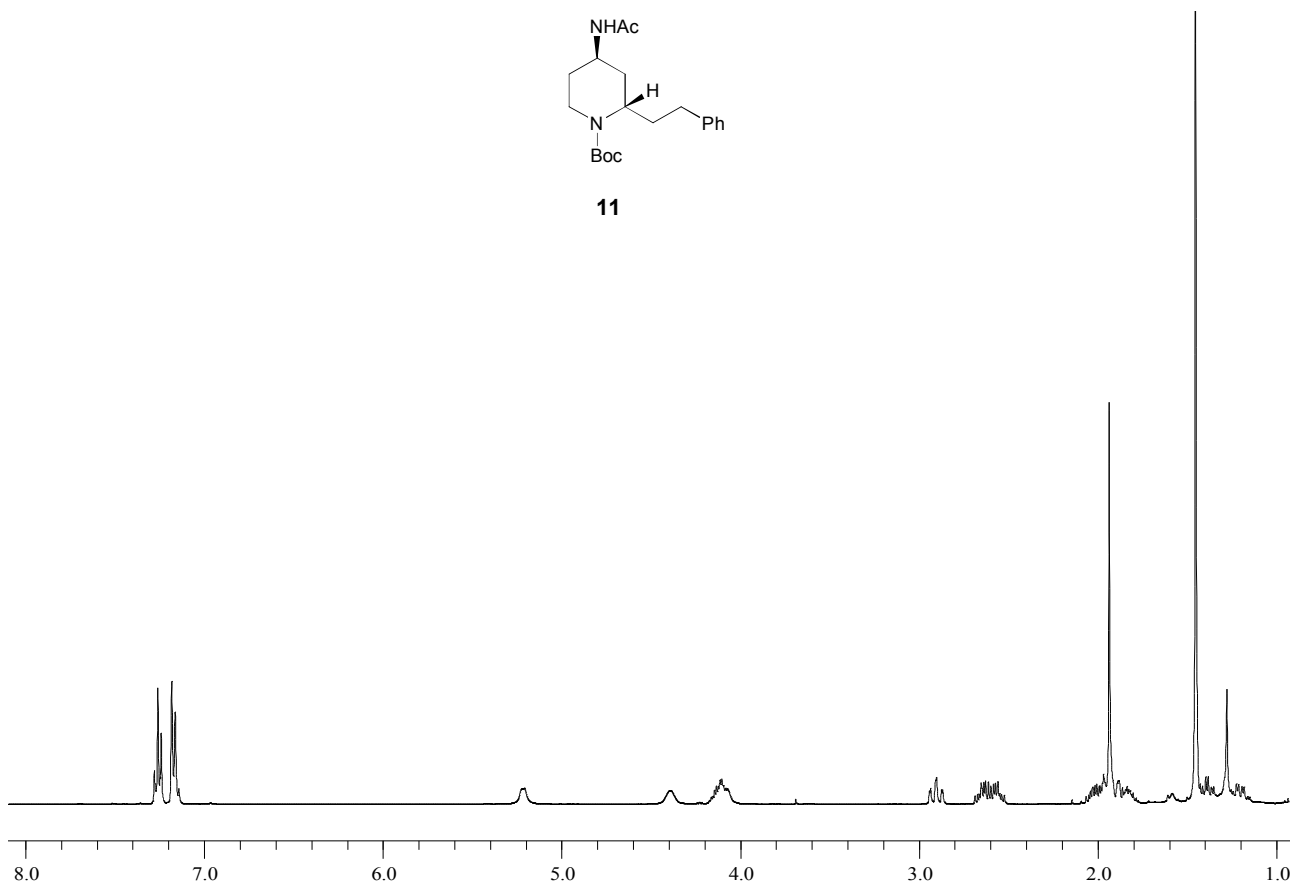

$^1\text{H}$  NMR 400 MHz, 333 K,  $\text{CDCl}_3$

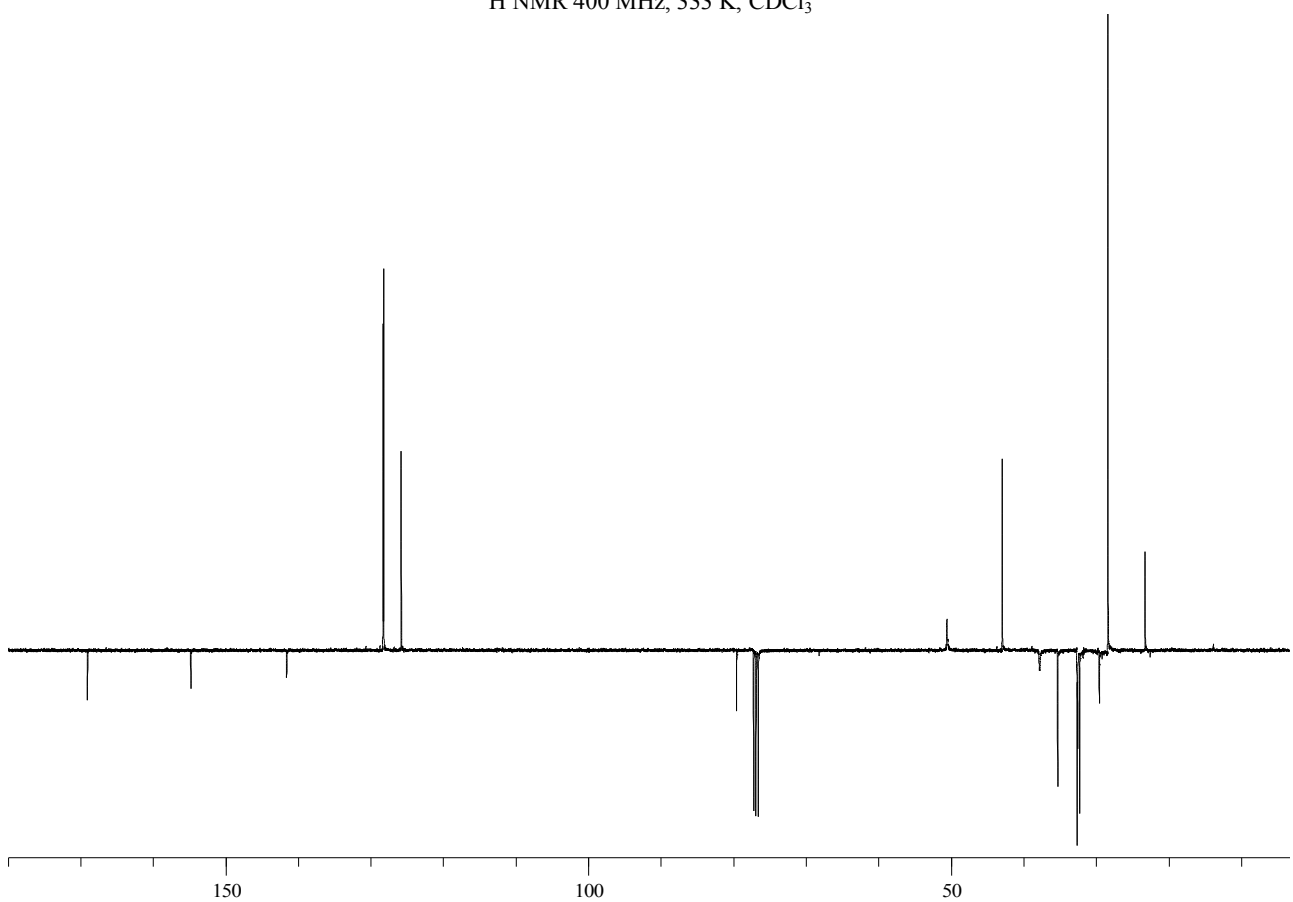

$^{13}\text{C}$  NMR 100 MHz, 333 K,  $\text{CDCl}_3$

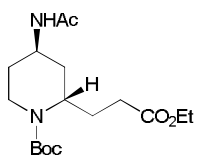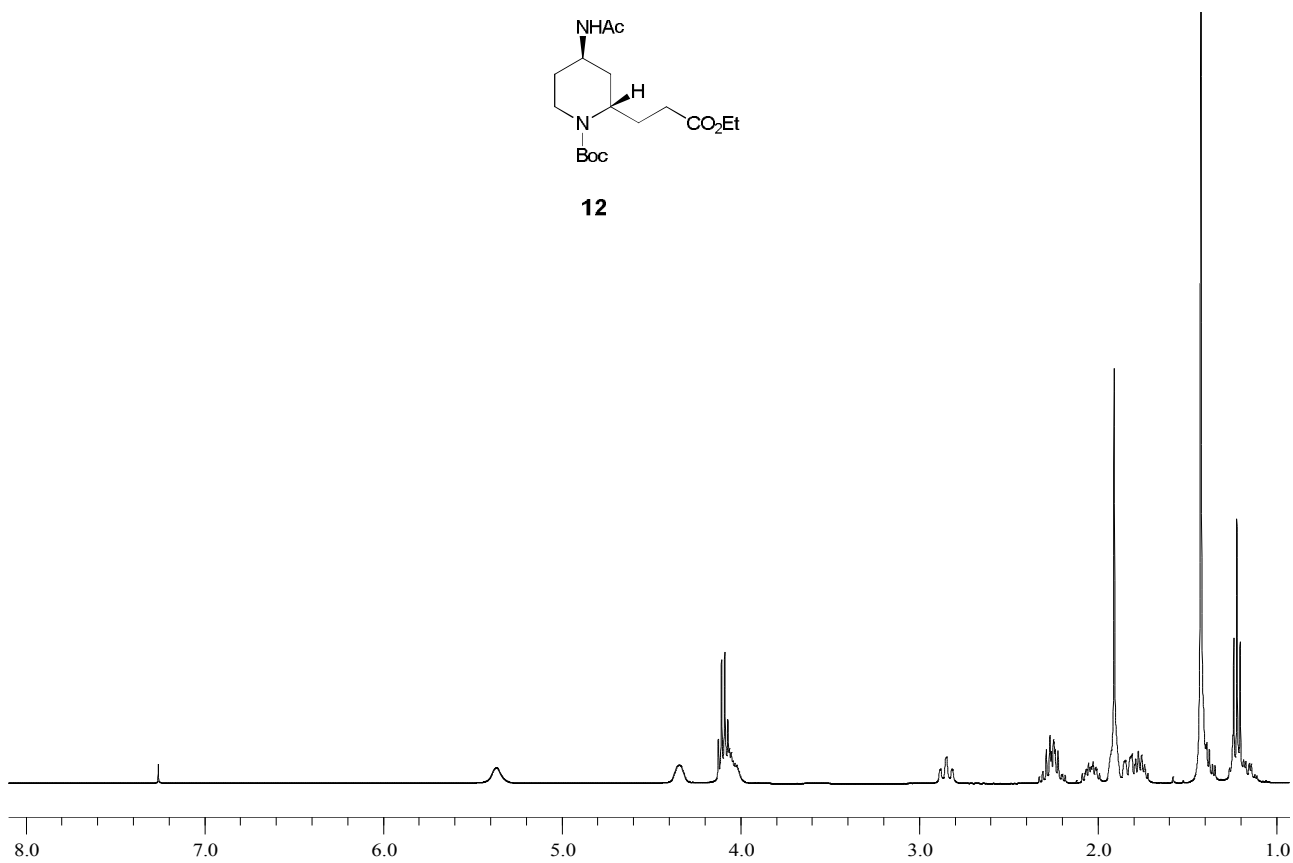

$^1\text{H}$  NMR 400 MHz, 333 K,  $\text{CDCl}_3$

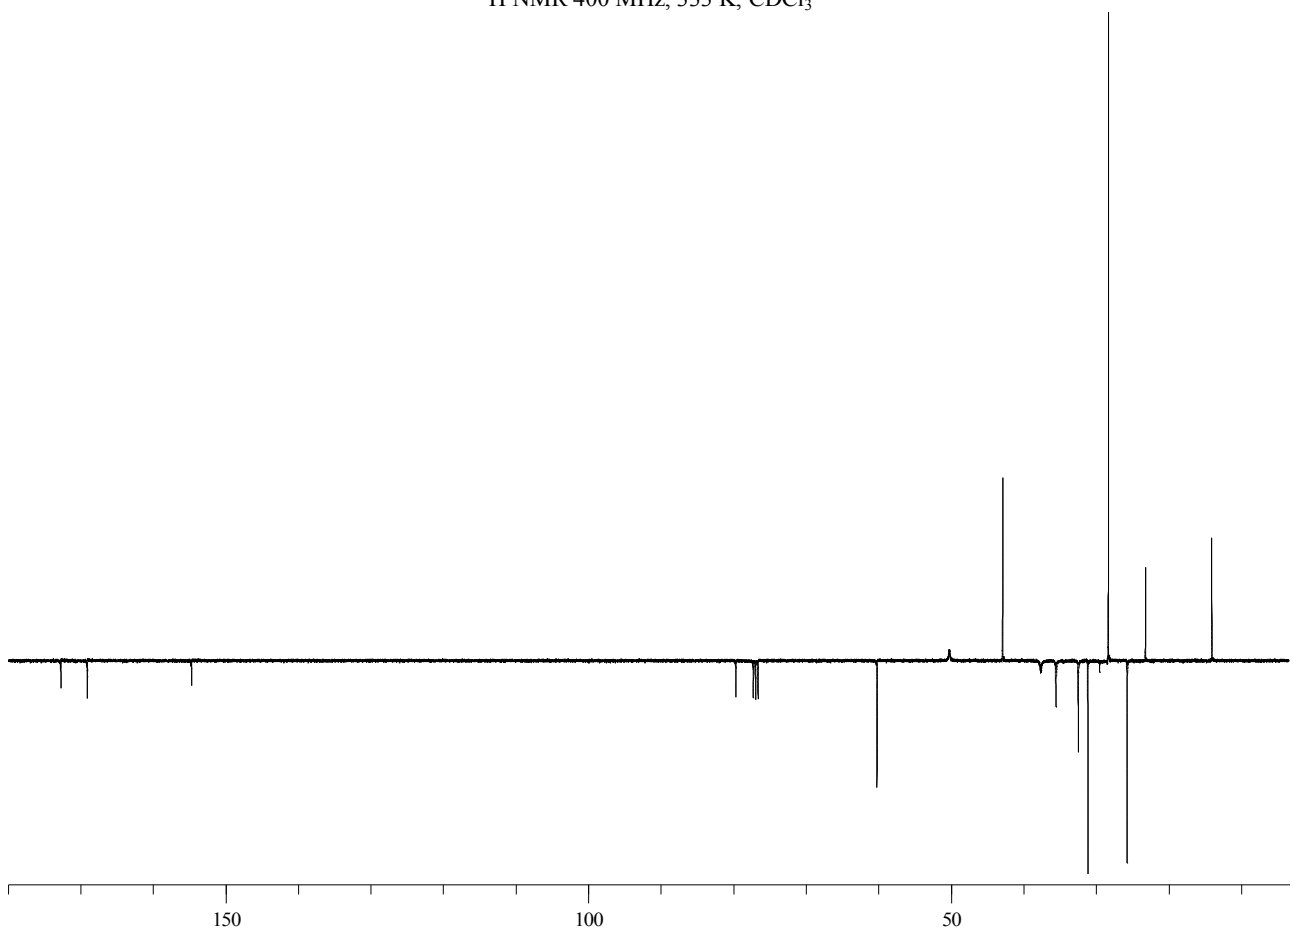

$^{13}\text{C}$  NMR 100 MHz, 333 K,  $\text{CDCl}_3$

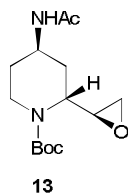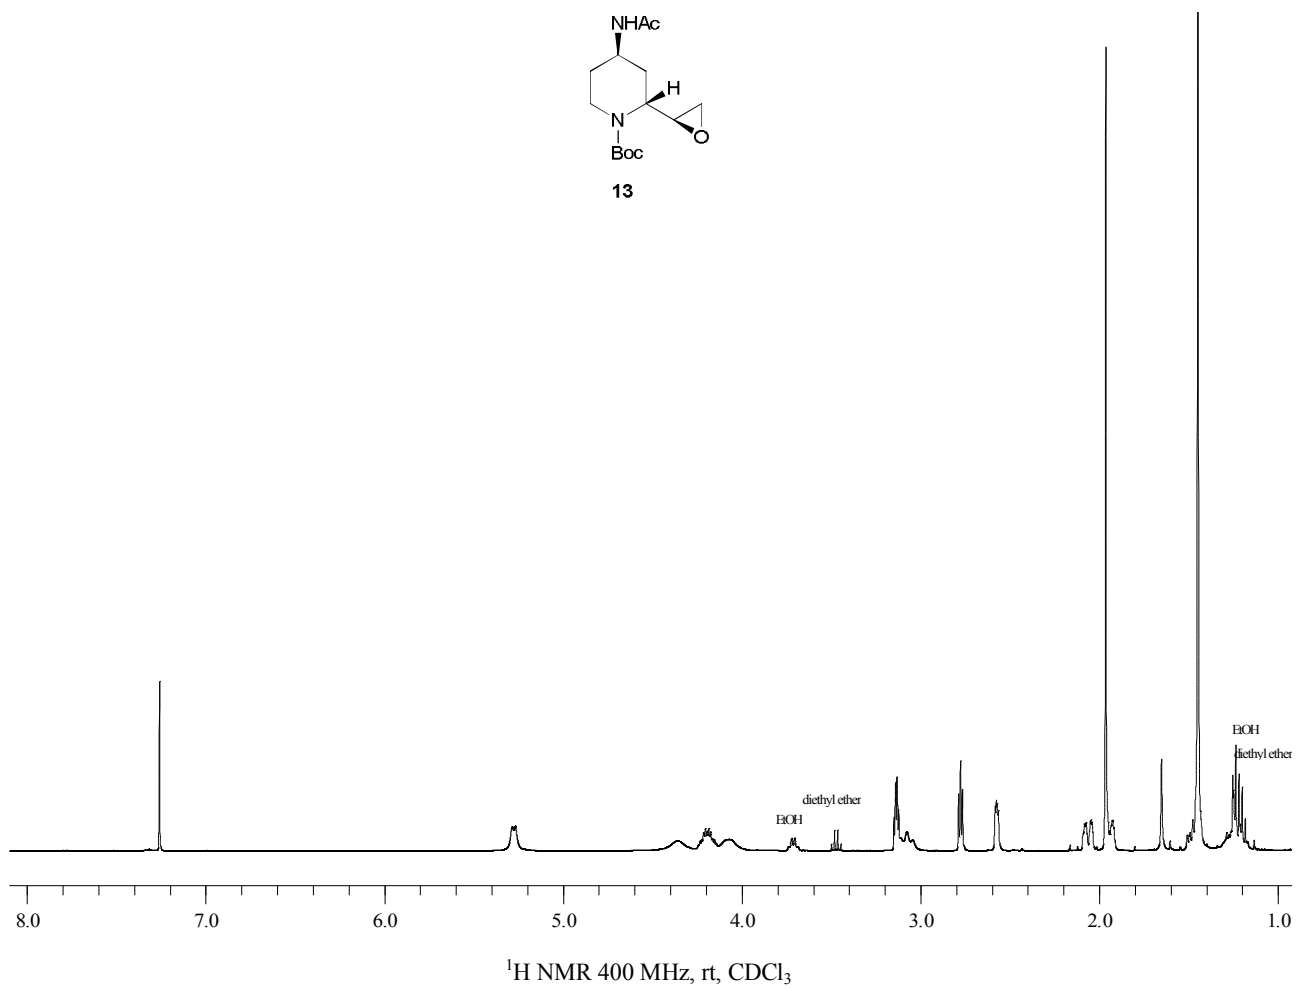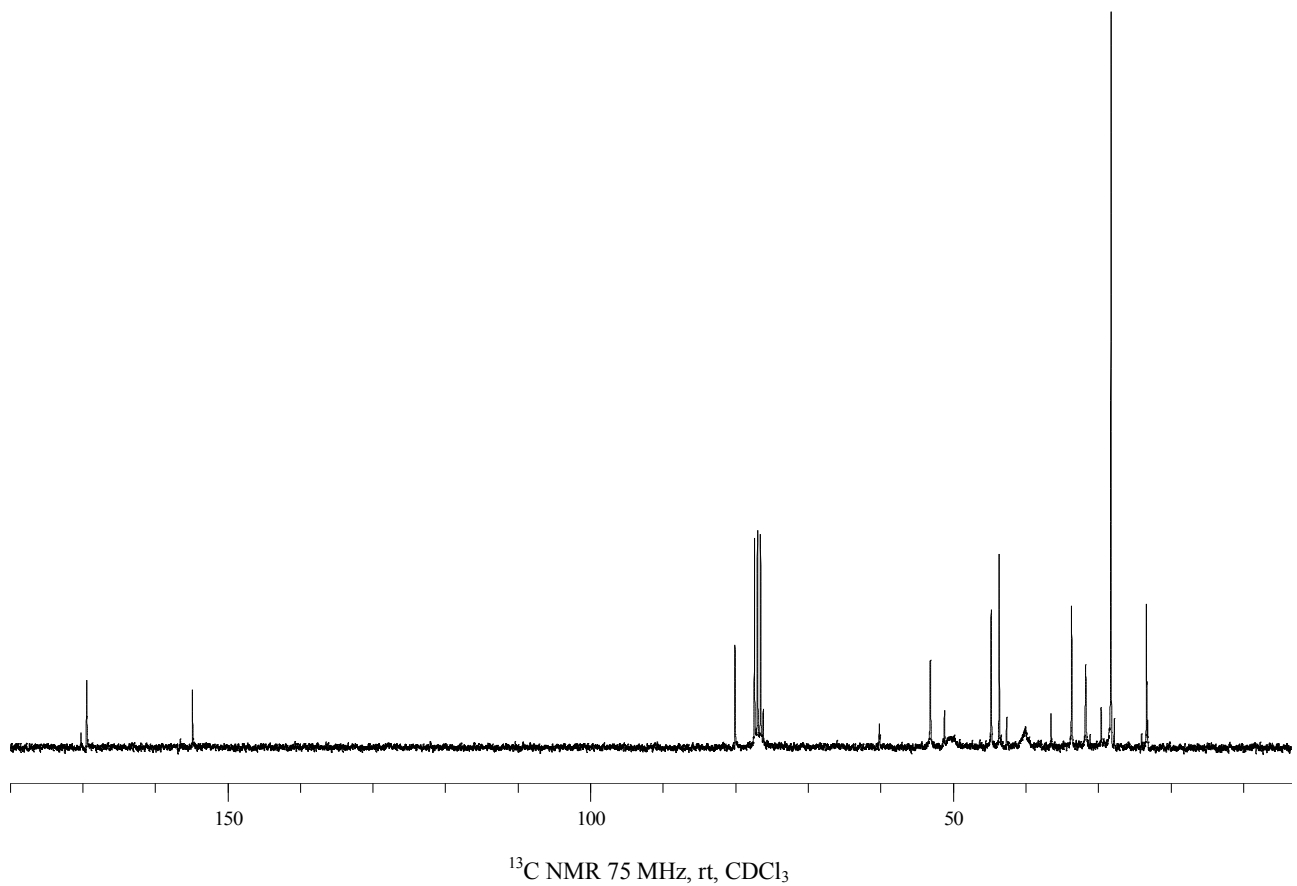

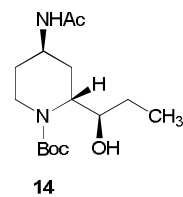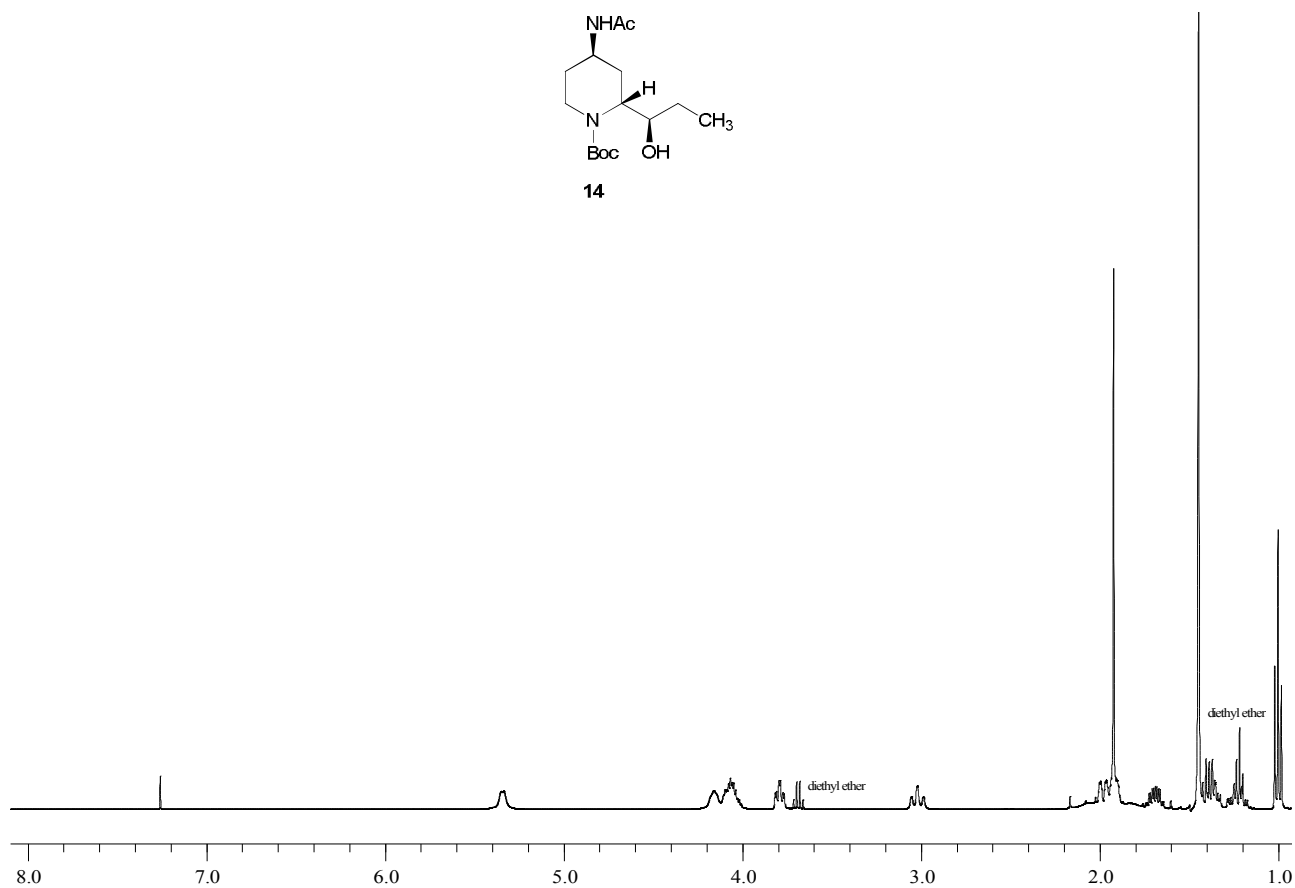

$^1\text{H}$  NMR 400 MHz, 333 K,  $\text{CDCl}_3$

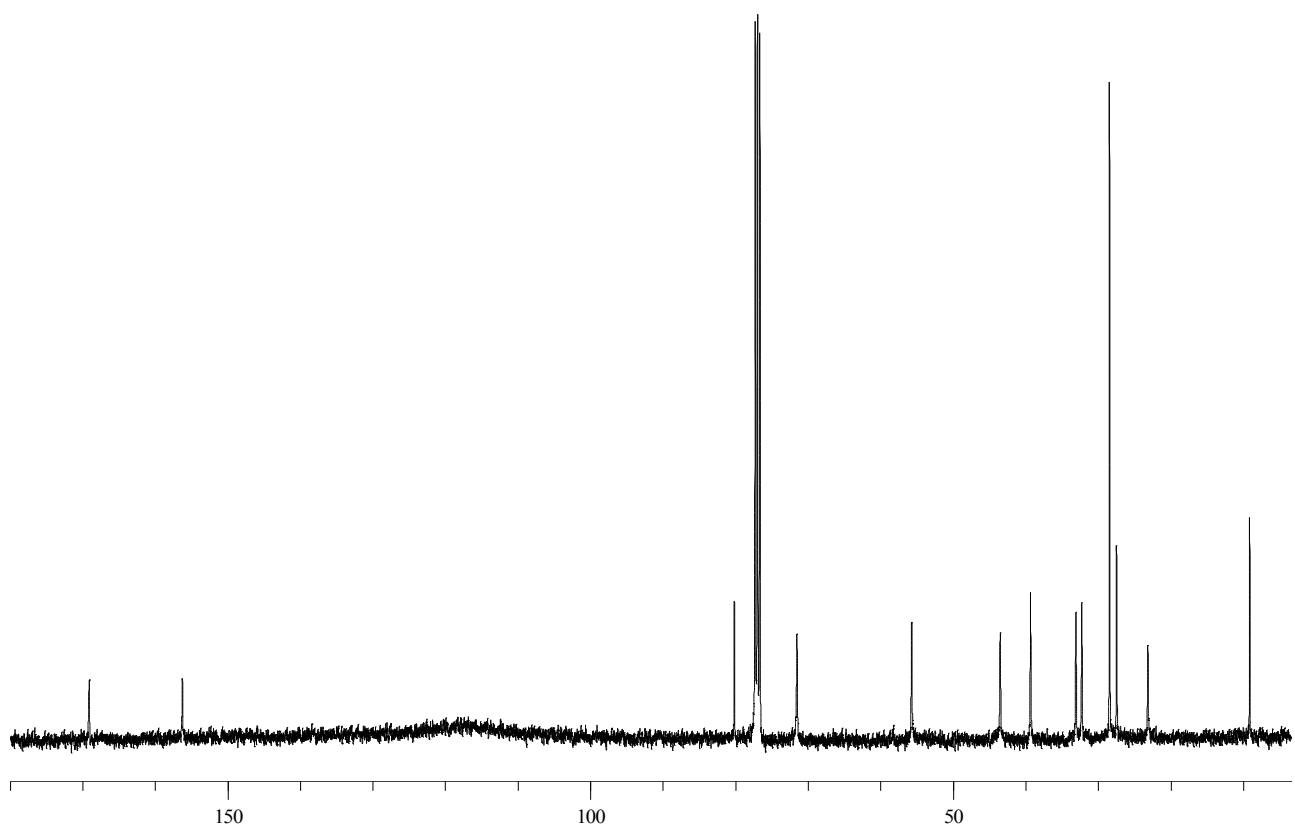

$^{13}\text{C}$  NMR 75 MHz, 333 K,  $\text{CDCl}_3$

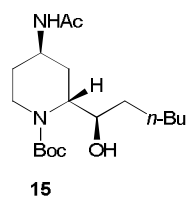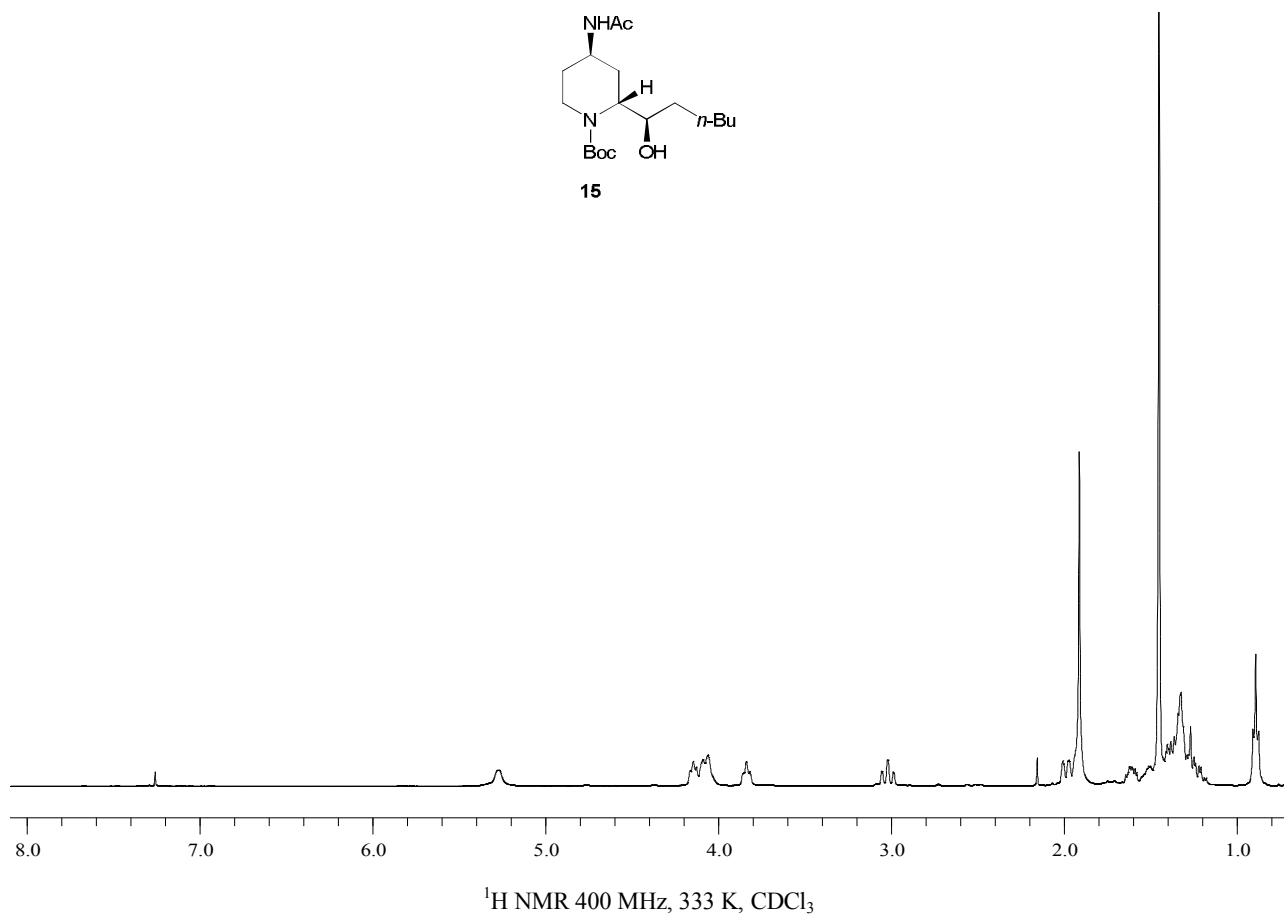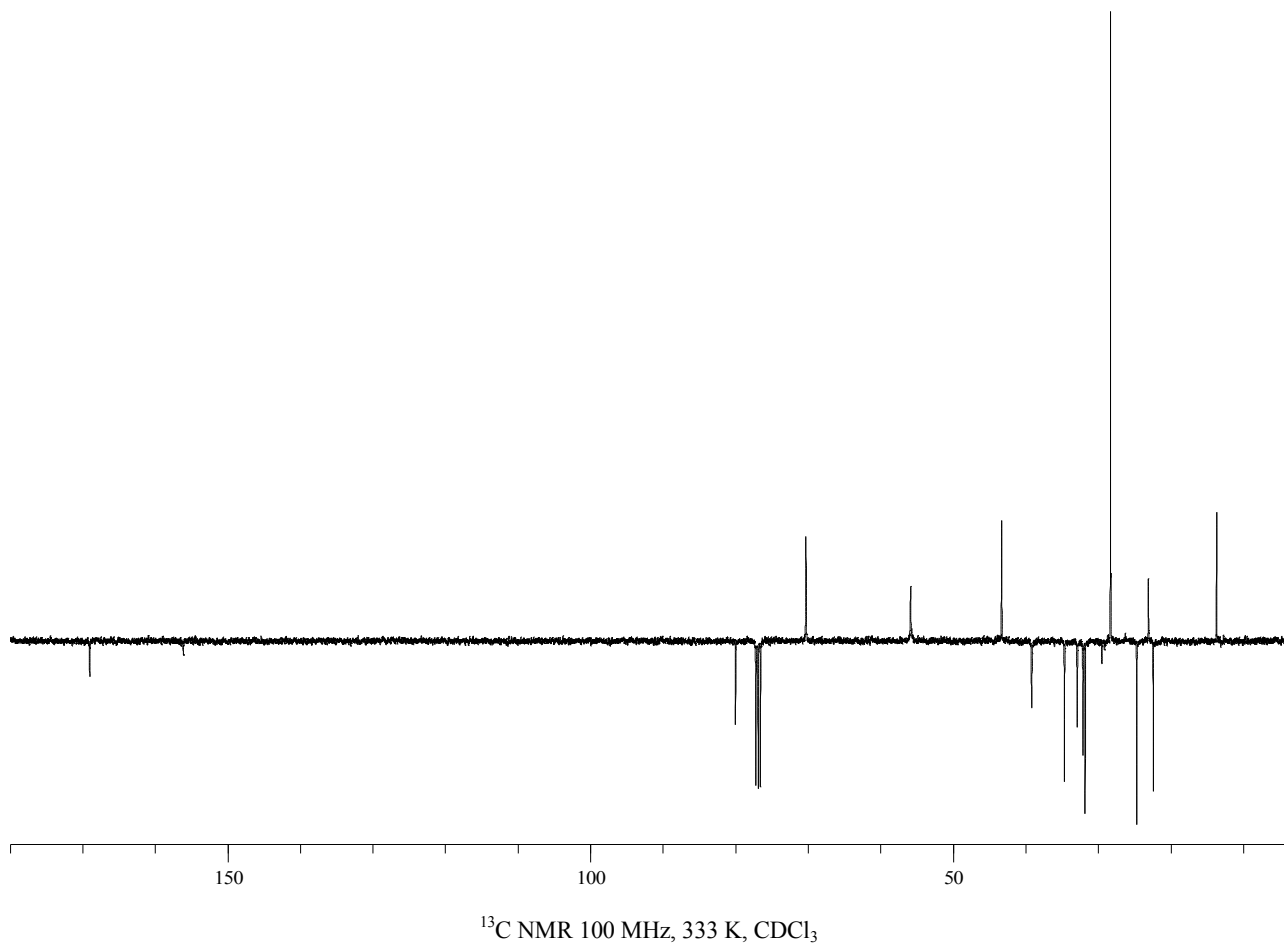

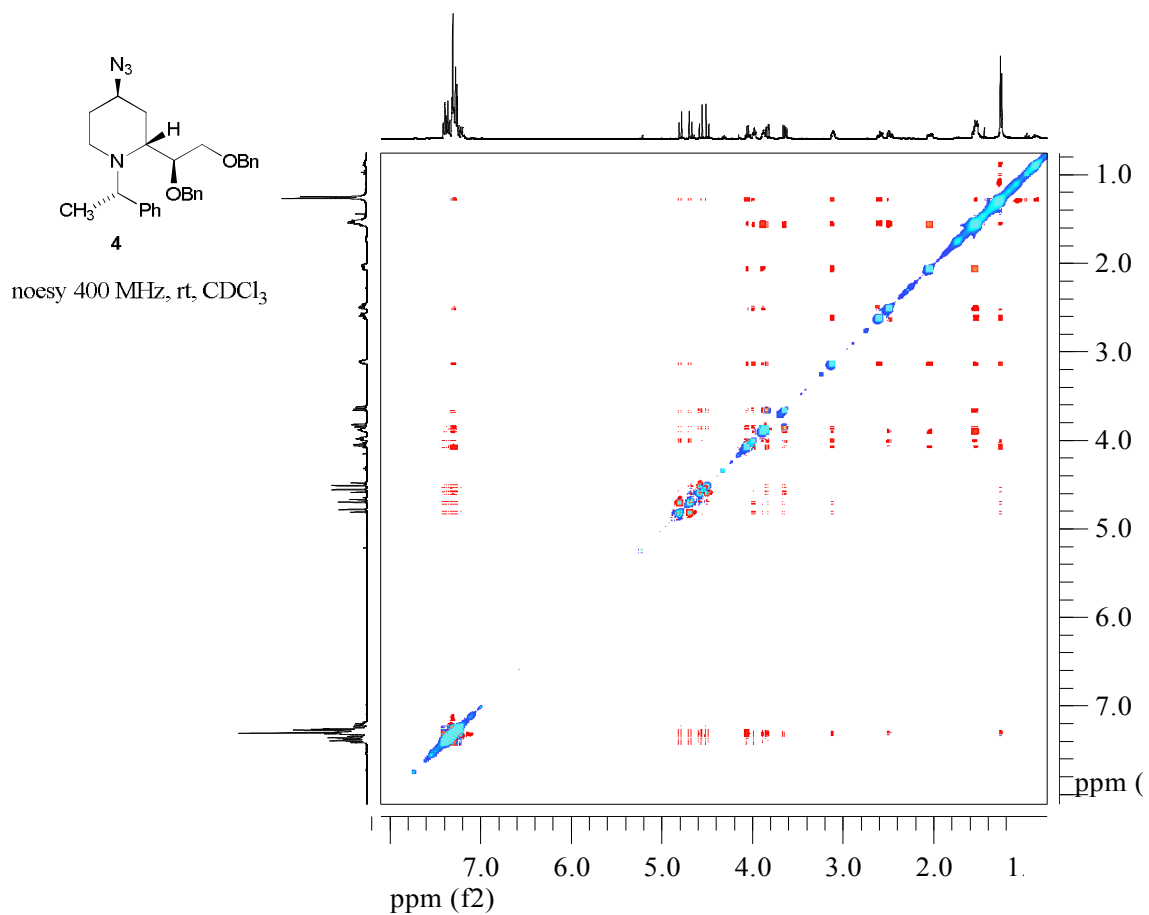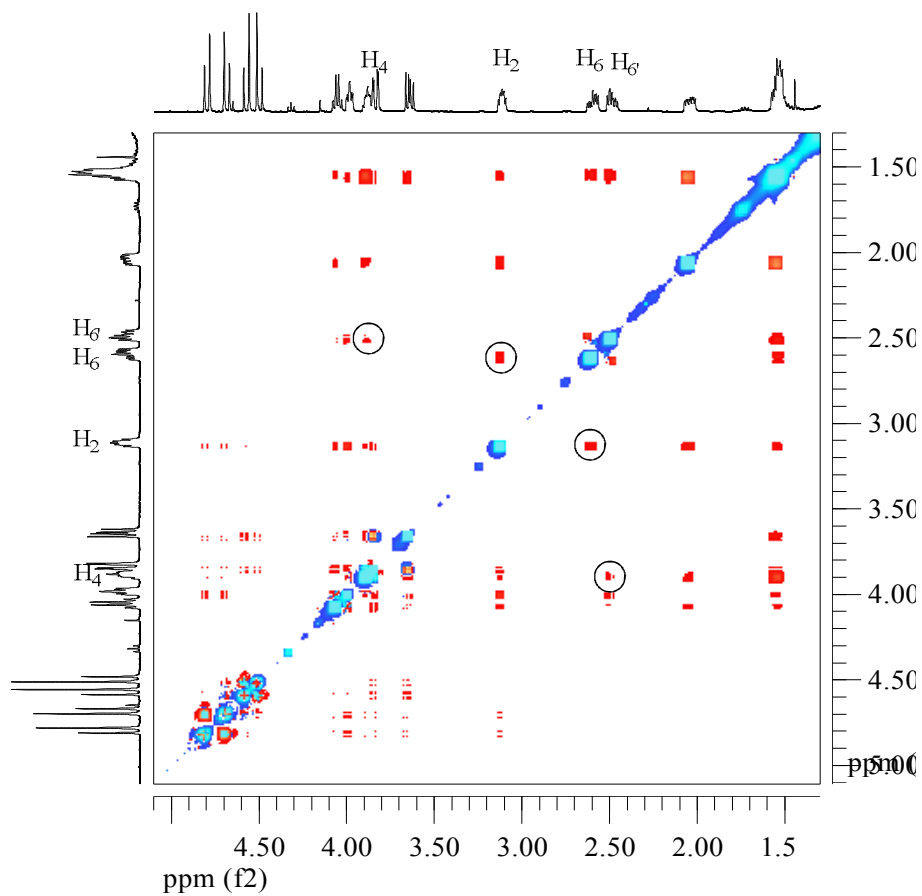

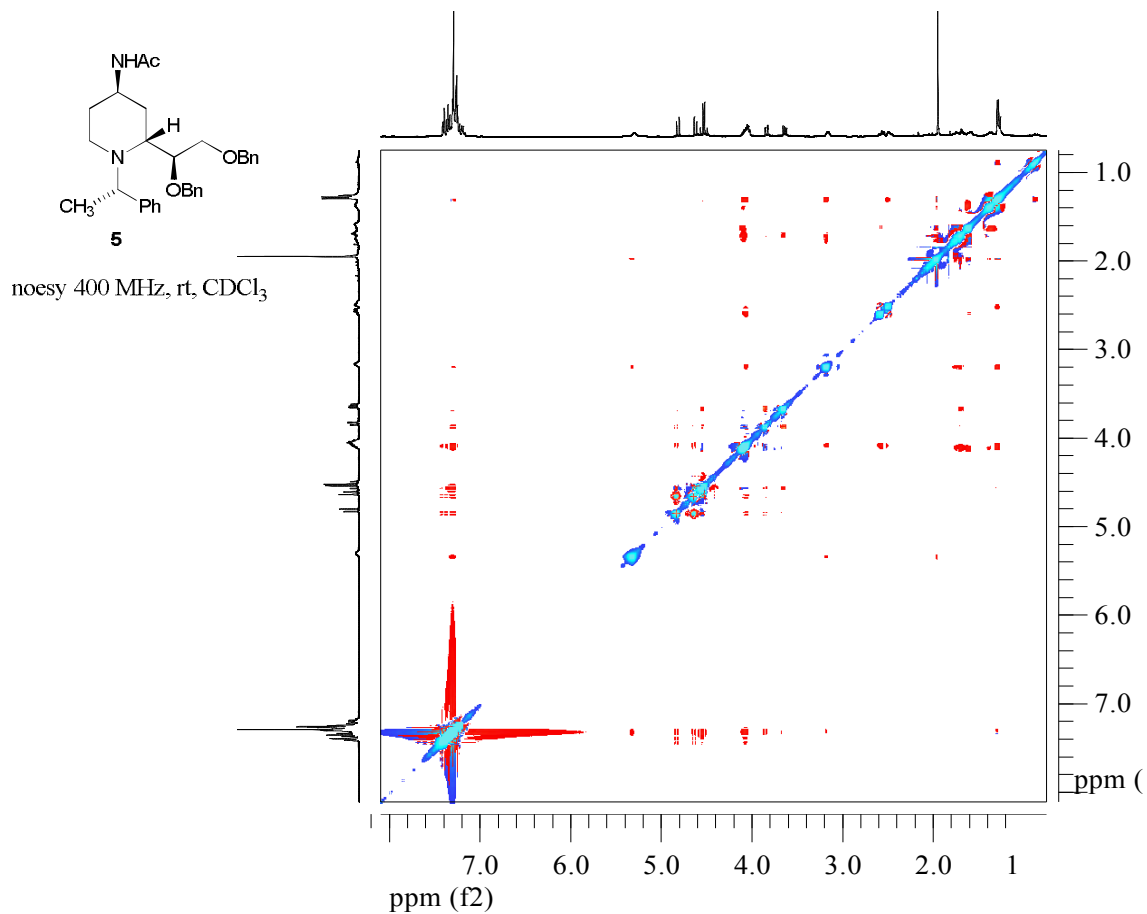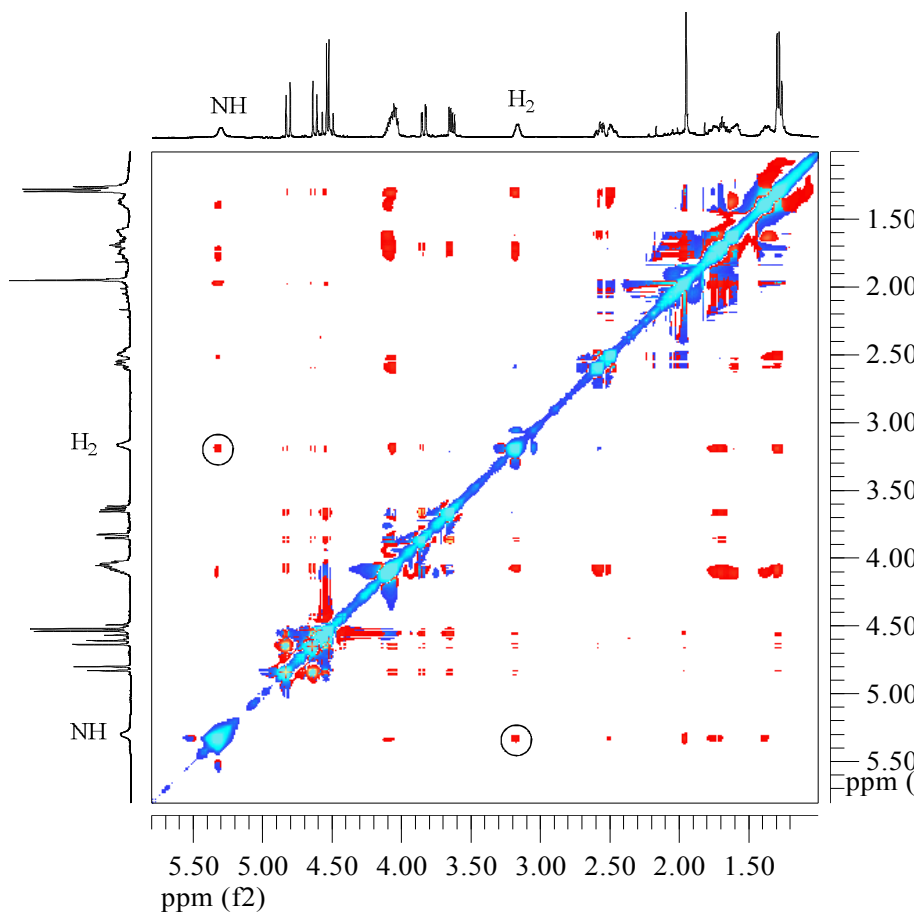

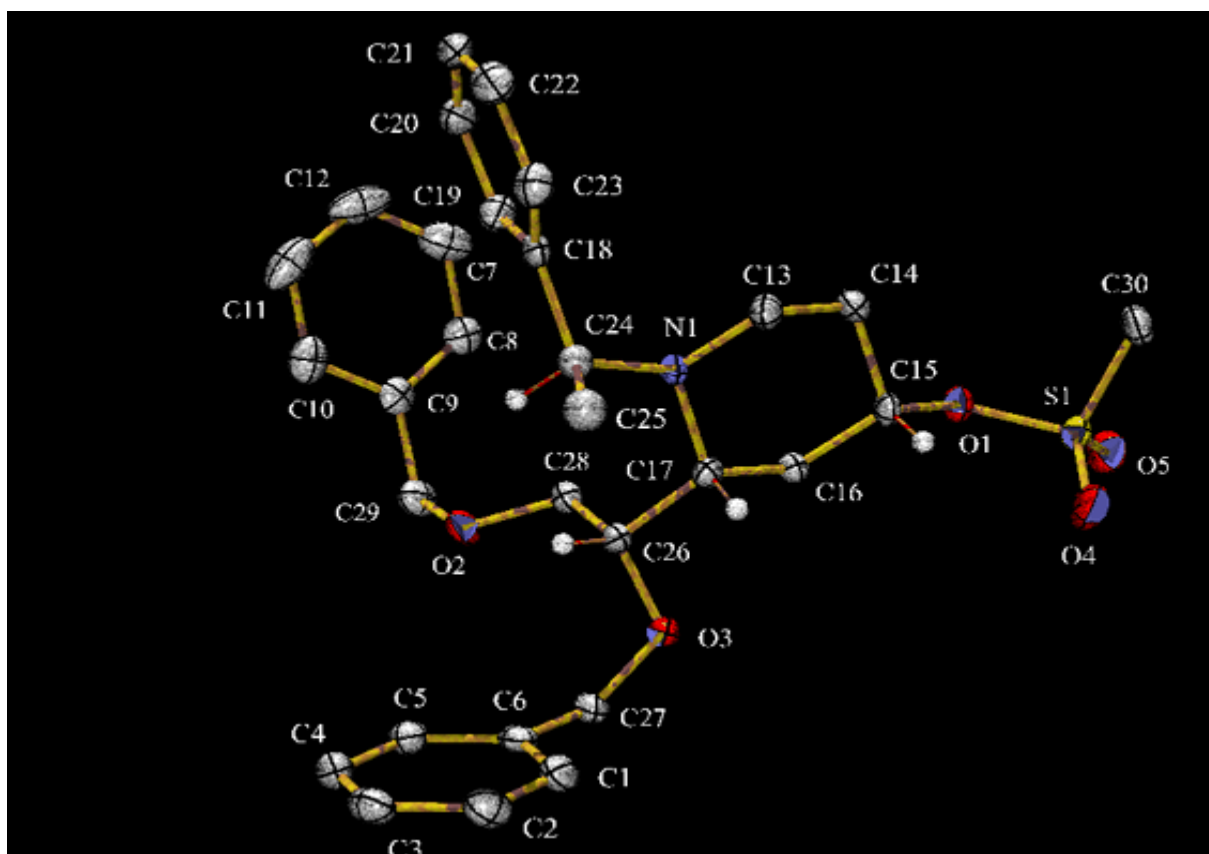

ORTEP drawing of compound 3. Thermal ellipsoids are at 50% probability level.
